# Supplementary material for: Tailoring the Stabilization and Pyrolysis Processes of Carbon Molecular Sieve Membrane Derived from Polyacrylonitrile for Ethylene/Ethane Separation
Source: MDPI journal article supplement (doi:10.3390/membranes12010093), 2022-01-15
Supplement: s1 [file s1]

# Tailoring the stabilization and pyrolysis processes of carbon molecular sieve membrane derived from polyacrylonitrile for ethylene/ethane separation

DaeHun Kim<sup>a,b</sup>, YongSung Kwon<sup>a,c</sup>, Jung-Hyun Lee<sup>b</sup>, Seong-Joong Kim<sup>d\*</sup> and You-In Park<sup>a\*</sup>

<sup>a</sup> Green Carbon research Center, Korea Research Institute of Chemical Technology (KRICT), Gajeong-ro 141, Yuseong-gu, Daejeon 34114, Republic of Korea

<sup>b</sup> Department of Chemical and Biological Engineering, Korea University, 5-1 Anam-dong, Seongbuk-gu, Seoul 136-713, Republic of Korea

<sup>c</sup> Department of Chemical and Biomolecular Engineering, Korea Advanced Institute of Science and Technology (KAIST), Daejeon, 34141, Republic of Korea

<sup>d</sup> Center for Convergence Bioceramic Materials, Convergence R&D Division, Korea Institute of Ceramic Engineering and Technology (KICET), 202 Osongsaengmyeong 1-ro, Osong-eup, Heungdeok-gu, Cheongju-si, Chungcheongbuk-do, 28160, Republic of Korea

\* Correspondence: authors: sjkim@kicet.re.kr (S.-J. Kim); yipark@kRICT.re.kr (Y.-I. Park)

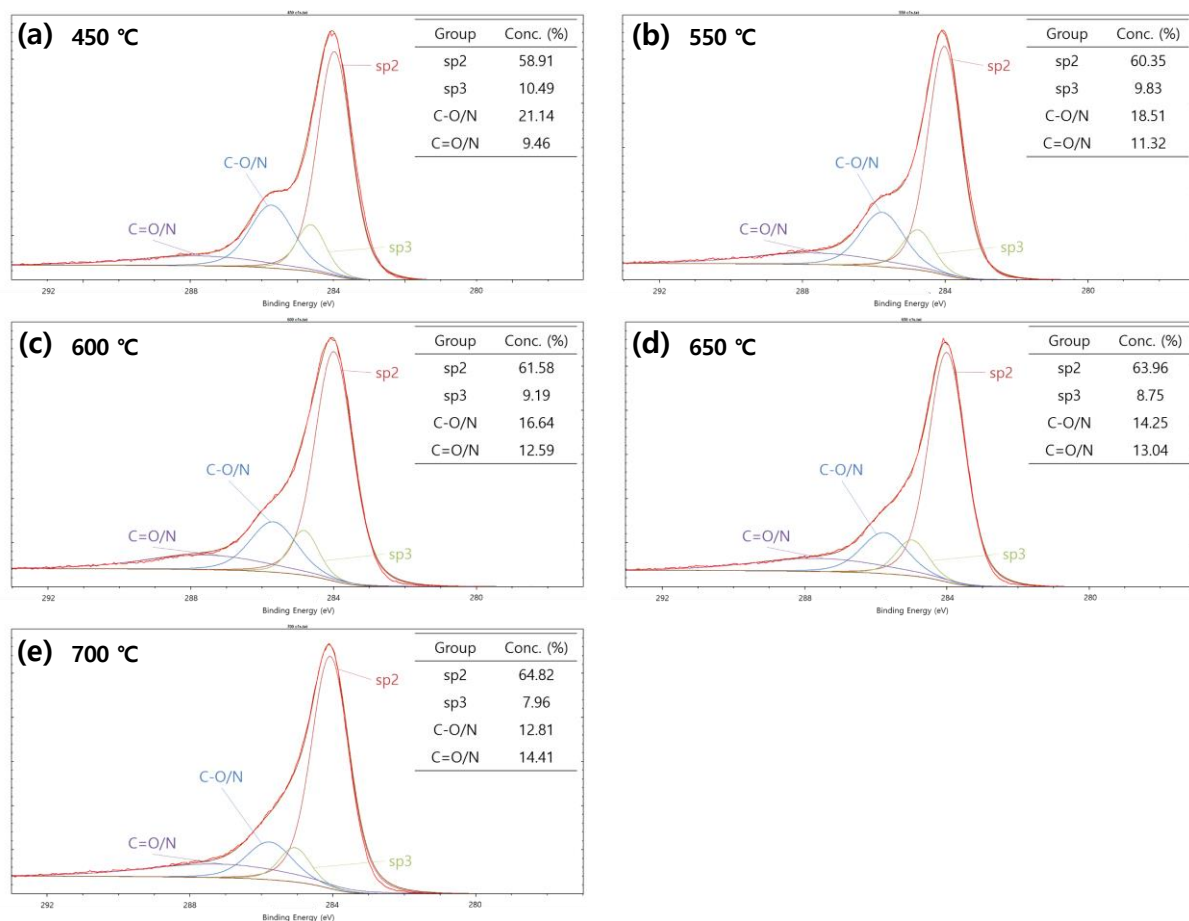

**Figure S1.** Deconvolution of C1s XPS spectra of CMSs pyrolyzed at different temperature.

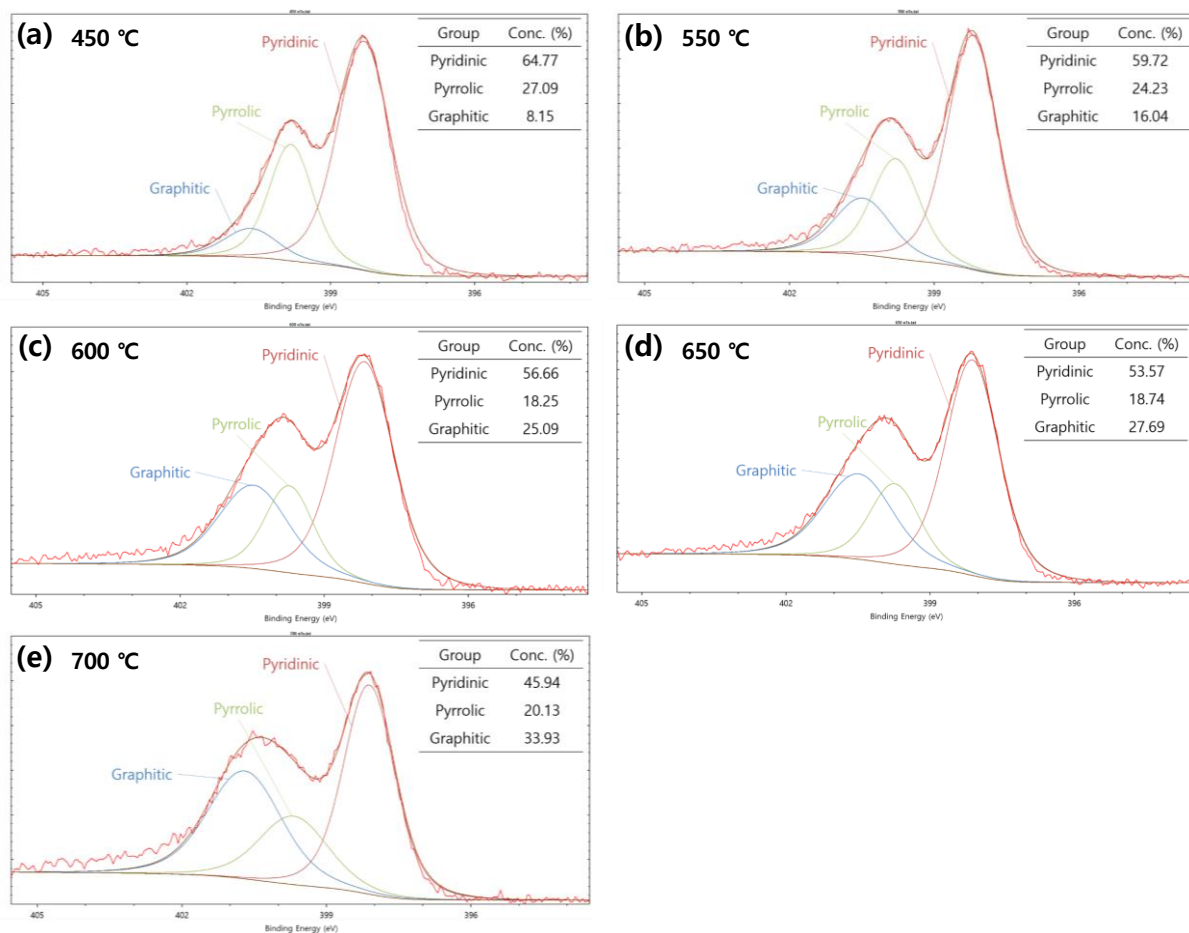

**Figure S2.** Deconvolution of N1s XPS spectra of CMSs pyrolyzed at different temperature.
